# Supplementary material
Source: PubMed Central journal article supplement (PMC7680500)
Supplement: 13167_2020_224_MOESM2_ESM.pdf [file 13167_2020_224_MOESM2_ESM.pdf]

Supplementary Table 2. Biomolecular networks analysis of the relationship between ivermectin and energy metabolism-related enzymes with IPA software.

| Drug name  | Target molecule(direct) | Target molecule(indirect) | Energy metabolism related enzymes |
|------------|-------------------------|---------------------------|-----------------------------------|
| ivermectin | ABCB1                   | APP                       | MT-CYB                            |
| ivermectin | Abcb1b                  | APP                       | MT-CYB                            |
| ivermectin | ABCG2                   | APP                       | MT-CYB                            |
| ivermectin | CYP3A4                  | STAT3                     | MT-CYB                            |
| ivermectin | CYP3A4                  | testosterone              | MT-CYB                            |
| ivermectin | cytokine                | AMPK                      | MT-CYB                            |
| ivermectin | cytokine                | APP                       | MT-CYB                            |
| ivermectin | cytokine                | DICER1                    | MT-CYB                            |
| ivermectin | cytokine                | Growth hormone            | MT-CYB                            |
| ivermectin | cytokine                | LEP                       | MT-CYB                            |
| ivermectin | cytokine                | LIF                       | MT-CYB                            |
| ivermectin | cytokine                | NFKBIA                    | MT-CYB                            |
| ivermectin | cytokine                | RELA                      | MT-CYB                            |
| ivermectin | cytokine                | STAT3                     | MT-CYB                            |
| ivermectin | cytokine                | TNF                       | MT-CYB                            |
| ivermectin | GLRB                    | APP                       | MT-CYB                            |
| ivermectin | Insulin                 | AMPK                      | MT-CYB                            |
| ivermectin | Insulin                 | APP                       | MT-CYB                            |
| ivermectin | Insulin                 | dihydrotestosterone       | MT-CYB                            |
| ivermectin | Insulin                 | Growth hormone            | MT-CYB                            |
| ivermectin | Insulin                 | HNRNPK                    | MT-CYB                            |
| ivermectin | Insulin                 | LEP                       | MT-CYB                            |
| ivermectin | Insulin                 | NFKBIA                    | MT-CYB                            |
| ivermectin | Insulin                 | PTEN                      | MT-CYB                            |
| ivermectin | Insulin                 | RELA                      | MT-CYB                            |
| ivermectin | Insulin                 | STAT3                     | MT-CYB                            |

|            |                |                |        |
|------------|----------------|----------------|--------|
| ivermectin | Insulin        | testosterone   | MT-CYB |
| ivermectin | Insulin        | TNF            | MT-CYB |
| ivermectin | Insulin        | UQCRC2         | MT-CYB |
| ivermectin | P glycoprotein | testosterone   | MT-CYB |
| ivermectin | P2RX7          | NFKBIA         | MT-CYB |
| ivermectin | P2RX7          | TNF            | MT-CYB |
| ivermectin | strychnine     | TNF            | MT-CYB |
| ivermectin | ABCB1          | APP            | MT-ND2 |
| ivermectin | Abcb1b         | APP            | MT-ND2 |
| ivermectin | ABCG2          | APP            | MT-ND2 |
| ivermectin | CYP3A4         | STAT3          | MT-ND2 |
| ivermectin | cytokine       | APP            | MT-ND2 |
| ivermectin | cytokine       | LIF            | MT-ND2 |
| ivermectin | cytokine       | STAT3          | MT-ND2 |
| ivermectin | GLRB           | APP            | MT-ND2 |
| ivermectin | Insulin        | APP            | MT-ND2 |
| ivermectin | Insulin        | HNRNPK         | MT-ND2 |
| ivermectin | Insulin        | SRC            | MT-ND2 |
| ivermectin | Insulin        | STAT3          | MT-ND2 |
| ivermectin | Insulin        | STK11          | MT-ND2 |
|            | ABCB1          | APP            | MT-ND5 |
|            | ABCB1          | SP1            | MT-ND5 |
|            | Abcb1b         | APP            | MT-ND5 |
|            | ABCG2          | APP            | MT-ND5 |
|            | CYP3A4         | STAT3          | MT-ND5 |
|            | CYP3A4         | testosterone   | MT-ND5 |
|            | cytokine       | APP            | MT-ND5 |
| ivermectin | cytokine       | BAX            | MT-ND5 |
| ivermectin | cytokine       | DICER1         | MT-ND5 |
|            | cytokine       | Growth hormone | MT-ND5 |

|            |                |                                       |        |
|------------|----------------|---------------------------------------|--------|
| ivermectin | cytokine       | LIF                                   | MT-ND5 |
|            | cytokine       | STAT3                                 | MT-ND5 |
| ivermectin | GLRB           | APP                                   | MT-ND5 |
| ivermectin | GLRB           | CLEC2D                                | MT-ND5 |
| ivermectin | Insulin        | APP                                   | MT-ND5 |
| ivermectin | Insulin        | Growth hormone                        | MT-ND5 |
| ivermectin | Insulin        | HNRNPK                                | MT-ND5 |
| ivermectin | Insulin        | MT-ND1                                | MT-ND5 |
| ivermectin | Insulin        | SP1                                   | MT-ND5 |
| ivermectin | Insulin        | STAT3                                 | MT-ND5 |
| ivermectin | Insulin        | testosterone                          | MT-ND5 |
| ivermectin | P glycoprotein | testosterone                          | MT-ND5 |
| ivermectin | P2RX7          | BAX                                   | MT-ND5 |
| ivermectin | CYP3A4         | STAT3                                 | OGDHL  |
| ivermectin | cytokine       | NFKBIA                                | OGDHL  |
| ivermectin | cytokine       | STAT3                                 | OGDHL  |
| ivermectin | Insulin        | miR-296-5p (miRNAs w/seed<br>GGGCCCC) | OGDHL  |
| ivermectin | Insulin        | NFKBIA                                | OGDHL  |
| ivermectin | Insulin        | SH3RF1                                | OGDHL  |
| ivermectin | Insulin        | STAT3                                 | OGDHL  |
| ivermectin | P2RX7          | NFKBIA                                | OGDHL  |
| ivermectin | ABCB1          | APP                                   | PKM    |
| ivermectin | ABCB1          | CUL7                                  | PKM    |
| ivermectin | ABCB1          | IFNG                                  | PKM    |
| ivermectin | ABCB1          | LNX1                                  | PKM    |
| ivermectin | ABCB1          | NTRK1                                 | PKM    |
| ivermectin | ABCG2          | 5-fluorouracil                        | PKM    |
| ivermectin | ABCB1          | reactive oxygen species               | PKM    |
| ivermectin | ABCB1          | SP1                                   | PKM    |

|            |          |                         |     |
|------------|----------|-------------------------|-----|
| ivermectin | Abcb1b   | APP                     | PKM |
| ivermectin | Abcb1b   | IFNG                    | PKM |
| ivermectin | Abcb1b   | progesterone            | PKM |
| ivermectin | ABCG2    | APP                     | PKM |
| ivermectin | ABCG2    | TRIM69                  | PKM |
| ivermectin | CYP3A4   | beta-estradiol          | PKM |
| ivermectin | CYP3A4   | cyclosporin A           | PKM |
| ivermectin | CYP3A4   | HSPA8                   | PKM |
| ivermectin | CYP3A4   | progesterone            | PKM |
| ivermectin | CYP3A4   | reactive oxygen species | PKM |
| ivermectin | CYP3A4   | sirolimus               | PKM |
| ivermectin | CYP3A4   | STAT3                   | PKM |
| ivermectin | cytokine | AKT1                    | PKM |
| ivermectin | cytokine | ANG                     | PKM |
| ivermectin | cytokine | APP                     | PKM |
| ivermectin | cytokine | CSF1                    | PKM |
| ivermectin | cytokine | EGF                     | PKM |
| ivermectin | cytokine | ELAVL1                  | PKM |
| ivermectin | cytokine | HIF1A                   | PKM |
| ivermectin | cytokine | IFNG                    | PKM |
| ivermectin | cytokine | MAPK1                   | PKM |
| ivermectin | cytokine | MAPK13                  | PKM |
| ivermectin | cytokine | MAPK3                   | PKM |
| ivermectin | cytokine | MYC                     | PKM |
| ivermectin | cytokine | RAF1                    | PKM |
| ivermectin | cytokine | reactive oxygen species | PKM |
| ivermectin | cytokine | RELA                    | PKM |
| ivermectin | cytokine | SOCS3                   | PKM |
| ivermectin | cytokine | STAT3                   | PKM |
| ivermectin | cytokine | TNF                     | PKM |

|            |         |                                                  |     |
|------------|---------|--------------------------------------------------|-----|
| ivermectin | GLRB    | APP                                              | PKM |
| ivermectin | GLRB    | EGFR                                             | PKM |
| ivermectin | GLRB    | lipopolysaccharide                               | PKM |
| ivermectin | Insulin | AKT1                                             | PKM |
| ivermectin | Insulin | APP                                              | PKM |
| ivermectin | Insulin | ARRB1                                            | PKM |
| ivermectin | Insulin | beta-estradiol                                   | PKM |
| ivermectin | Insulin | CASP3                                            | PKM |
| ivermectin | Insulin | CDK2                                             | PKM |
| ivermectin | Insulin | CDK4                                             | PKM |
| ivermectin | Insulin | CDKN1A                                           | PKM |
| ivermectin | Insulin | CYP1A1                                           | PKM |
| ivermectin | Insulin | D-glucose                                        | PKM |
| ivermectin | Insulin | EGFR                                             | PKM |
| ivermectin | Insulin | ELAVL1                                           | PKM |
| ivermectin | Insulin | EPAS1                                            | PKM |
| ivermectin | Insulin | ERK1/2                                           | PKM |
| ivermectin | Insulin | FBX032                                           | PKM |
| ivermectin | Insulin | FN1                                              | PKM |
| ivermectin | Insulin | HIF1A                                            | PKM |
| ivermectin | Insulin | HNF4A                                            | PKM |
| ivermectin | Insulin | IFNG                                             | PKM |
| ivermectin | Insulin | IGF1                                             | PKM |
| ivermectin | Insulin | IGF1R                                            | PKM |
| ivermectin | Insulin | KHDRBS1                                          | PKM |
| ivermectin | Insulin | MAPK1                                            | PKM |
| ivermectin | Insulin | MAPK3                                            | PKM |
| ivermectin | Insulin | MAPT                                             | PKM |
| ivermectin | Insulin | miR-133a-3p (and other<br>miRNAs w/seed UUGGUCC) | PKM |

|            |                |                         |     |
|------------|----------------|-------------------------|-----|
| ivermectin | Insulin        | mir-148                 | PKM |
| ivermectin | Insulin        | MTOR                    | PKM |
| ivermectin | Insulin        | MTORC1                  | PKM |
| ivermectin | Insulin        | MYC                     | PKM |
| ivermectin | Insulin        | PDK4                    | PKM |
| ivermectin | Insulin        | PIK3R1                  | PKM |
| ivermectin | Insulin        | PRKCZ                   | PKM |
| ivermectin | Insulin        | progesterone            | PKM |
| ivermectin | Insulin        | PSEN1                   | PKM |
| ivermectin | Insulin        | PTBP1                   | PKM |
| ivermectin | Insulin        | PTEN                    | PKM |
| ivermectin | Insulin        | RAF1                    | PKM |
| ivermectin | Insulin        | reactive oxygen species | PKM |
| ivermectin | Insulin        | RELA                    | PKM |
| ivermectin | Insulin        | RPTOR                   | PKM |
| ivermectin | Insulin        | SHBG                    | PKM |
| ivermectin | Insulin        | SIRT2                   | PKM |
| ivermectin | Insulin        | SP1                     | PKM |
| ivermectin | Insulin        | STAT3                   | PKM |
| ivermectin | Insulin        | TNF                     | PKM |
| ivermectin | Insulin        | TRIM63                  | PKM |
| ivermectin | Insulin        | UCP2                    | PKM |
| ivermectin | Insulin        | YWHAE                   | PKM |
| ivermectin | ivermectin     | Insulin                 | PKM |
| ivermectin | P glycoprotein | CASP3                   | PKM |
| ivermectin | P glycoprotein | cyclosporin A           | PKM |
| ivermectin | P glycoprotein | EGF                     | PKM |
| ivermectin | P glycoprotein | IFNG                    | PKM |
| ivermectin | P glycoprotein | progesterone            | PKM |
| ivermectin | P2RX4          | FANCD2                  | PKM |

|            |            |                                |       |
|------------|------------|--------------------------------|-------|
| ivermectin | P2RX4      | MCM2                           | PKM   |
| ivermectin | P2RX7      | ARRB2                          | PKM   |
| ivermectin | P2RX7      | CASP3                          | PKM   |
| ivermectin | P2RX7      | ERK1/2                         | PKM   |
| ivermectin | P2RX7      | lipopolysaccharide             | PKM   |
| ivermectin | P2RX7      | MAPK1                          | PKM   |
| ivermectin | P2RX7      | MAPK3                          | PKM   |
| ivermectin | P2RX7      | reactive oxygen species        | PKM   |
| ivermectin | P2RX7      | TNF                            | PKM   |
| ivermectin | Rbp        | SOCS3                          | PKM   |
| ivermectin | strychnine | TNF                            | PKM   |
| ivermectin | cytokine   | hydrogen peroxide              | UQCRH |
| ivermectin | cytokine   | PPARGC1A                       | UQCRH |
| ivermectin | Insulin    | hydrogen peroxide              | UQCRH |
| ivermectin | Insulin    | miR-376a-3p (and other miRNAs) | UQCRH |
| ivermectin | Insulin    | PPARGC1A                       | UQCRH |
| ivermectin | Insulin    | UQCRC2                         | UQCRH |

---
